# Supplementary material
Source: MDPI journal article supplement (https://www.mdpi.com/2306-5729/3/1/9)
Supplement: s1 [file s1]

Supplementary Materials to

# **A Dataset of Portuguese Traditional Recipes Based on Published Cookery Books**

**Luís Silva Dias \* and Alexandra Soveral Dias**

English-Portuguese glossary of ingredient names

|                                 |                                          |
|---------------------------------|------------------------------------------|
| 'Água-pé'                       | Água-pé (I011)                           |
| Alfonsino                       | Imperador (I203)                         |
| 'Alheira'                       | Alheira (I021)                           |
| Allis shad                      | Sável (I383)                             |
| Allis shad blood                | Sangue de sável (I376)                   |
| Allis shad roe                  | Ovas de sável (I273)                     |
| Allspice                        | Alcepás/Acepás/Pimenta da Jamaica (I018) |
| Almond                          | Amêndoa (I027)                           |
| 'Americano' wine                | Vinho de cheiro (I414)                   |
| Aniseed                         | Erva doce (I148)                         |
| Apple                           | Maçã (I226)                              |
| Apple                           | Pero (I305)                              |
| Arrowroot                       | Araruta (I028)                           |
| Ash                             | Cinza (I117)                             |
| Asparagus                       | Espargo (I152)                           |
| Atlantic cod (salted and dried) | Bacalhau (I035)                          |
| Atlantic horse mackerel         | Carapau (I092)                           |
| Atlantic John dory              | Peixe-galo (I293)                        |
| Atlantic mackerel               | Sarda (I380)                             |
| Atlantic salmon                 | Salmão (I357)                            |
| Aubergine                       | Beringela (I051)                         |
| Avocado                         | Pera abacate (I296)                      |
|                                 |                                          |
| Bacon                           | Bacon (I039)                             |
| Baker's yeast                   | Fermento (I171)                          |
| Banana                          | Banana (I040)                            |
| Barbel                          | Barbo (I044)                             |
| Barnacle                        | Craca (I139)                             |
| Basil                           | Manjerição (I228)                        |
| Bayleaf                         | Louro (I224)                             |
| Bean                            | Feijão (I168)                            |
| Beef                            | Vaca (I406)                              |
| Beef chuck                      | Acém de vaca (I007)                      |
| Beef blood                      | Sangue de vaca (I377)                    |

|                       |                                     |
|-----------------------|-------------------------------------|
| Beef brisket          | Peito de vaca (I290)                |
| Beef for boiling      | Aba de vaca (I001)                  |
| Beef front leg        | Mão de vaca (I235)                  |
| Beef leg              | Perna de vaca (I303)                |
| Beef liver            | Fígado de vaca (I181)               |
| Beef marrow bone      | Osso de vaca (I268)                 |
| Beef neck             | Pescoço de vaca (I310)              |
| Beef round            | Ganso de vaca (I194)                |
| Beef round-silverside | Vaca pojadouro bife alto (I407)     |
| Beef rump             | Alcatra de vaca (I016)              |
| Beef shoulder         | Chambão de vaca (I110)              |
| Beef sirloin          | Lombo de vaca (I222)                |
| Beef spleen           | Baço de vaca (I037)                 |
| Beef thick flank      | Rabadilha de vaca (I336)            |
| Beef top sirloin      | Vaca vazia bife (I408)              |
| Beef tripe            | Dobrada/Tripa de vaca (I142)        |
| Beer                  | Cerveja (I108)                      |
| Beet                  | Beterraba (I052)                    |
| Black olive           | Azeitona preta (I033)               |
| Black pepper          | Pimenta preta (I314)                |
| Blackbelly rosefish   | Cantaril/Cantoril/Boca-negra (I088) |
| Black-eyed bean       | Feijão frade (I169)                 |
| Blackspot seabream    | Goraz (I199)                        |
| Blood 'chouriço'      | Chouriço de sangue (I115)           |
| Brandy                | Brandy (I059)                       |
| Bread                 | Pão (I277)                          |
| Broad bean            | Fava (I166)                         |
| Broad bean leaf       | Rama de fava (I342)                 |
| Brown trout           | Truta (I401)                        |
| 'Butelo'              | Butelo (I065)                       |
| Butter                | Manteiga (I231)                     |
| Cabbage               | Couve (I136)                        |
| Canary                | Canarinho (I086)                    |
| Caper                 | Alcaparra (I015)                    |
| Capon                 | Capão (I089)                        |
| Capon giblets         | Miúdos de capão (I245)              |
| Carp                  | Carpa (I096)                        |
| 'Carqueja'            | Carqueja (I097)                     |
| Carrot                | Cenoura (I107)                      |
| Cauliflower           | Couve-flor (I138)                   |
| Celery                | Aipo (I014)                         |
| Chard                 | Celga (I106)                        |
| Chestnut              | Castanha (I102)                     |

|                            |                                   |
|----------------------------|-----------------------------------|
| Chicken                    | Frango (I187)                     |
| Chicken blood              | Sangue de frango (I366)           |
| Chicken breast             | Peito de frango (I288)            |
| Chicken giblets            | Miúdos de frango (I246)           |
| Chicken neck               | Pescoço de frango (I309)          |
| Chicken wing               | Asa de frango (I030)              |
| Chickpea                   | Grão (I200)                       |
| Chilli sauce               | Pimentão/Massa de pimentão (I318) |
| 'Chouriço/linguiça'        | Chouriço/linguiça (I116)          |
| Chub mackerel              | Cavala (I104)                     |
| Cinnamon                   | Canela (I087)                     |
| Clam                       | Amêijoa (I025)                    |
| Clove                      | Cravinho (I140)                   |
| Cock                       | Galo (I193)                       |
| Cock blood                 | Sangue de galo (I368)             |
| Cognac                     | Cognac/Conhaque (I122)            |
| Common cockle              | Berbigão (I050)                   |
| Common cuttlefish          | Choco (I113)                      |
| Common octopus             | Polvo (I326)                      |
| Common periwinkle          | Caramujo (I091)                   |
| Common seabream            | Pargo (I282)                      |
| Common seabream head       | Cabeça de pargo (I073)            |
| Common spiny lobster       | Lagosta (I206)                    |
| Common spiny lobster blood | Sangue de lagosta (I369)          |
| Common torpedo             | Tremelga (I393)                   |
| Common torpedo liver       | Fígado de tremelga (I180)         |
| Conger                     | Safio/Congro (I355)               |
| Conger head                | Cabeça de congro (I072)           |
| Coriander                  | Coentro (I121)                    |
| Corn                       | Milho (I242)                      |
| Corn bread                 | Broa/Pão de milho (I060)          |
| Corn flour                 | Farinha de milho/Carolo (I162)    |
| Couscous                   | Cuscus (I141)                     |
| Cream                      | Nata (I260)                       |
| Cucumber                   | Pepino (I295)                     |
| Cumin                      | Cominho (I126)                    |
| Cured ham                  | Presunto (I330)                   |
| Curly dock                 | Catacuz (I103)                    |
| Dark beer                  | Cerveja preta (I109)              |
| Dill                       | Endro (I144)                      |
| Dry plum                   | Ameixa seca (I026)                |
| Duck                       | Pato (I285)                       |
| Duck blood                 | Sangue de pato (I373)             |

|                         |                             |
|-------------------------|-----------------------------|
| Edible crab             | Sapateira (I379)            |
| Egg                     | Ovo (I274)                  |
| Egg white               | Clara (I118)                |
| Egg yolk                | Gema (I196)                 |
| Estrela mountain cheese | Queijo da Serra (I332)      |
| European anchovy        | Biqueirão (I054)            |
| European eel            | Enguia/Eiró/Angula (I145)   |
| European hake           | Pescada (I307)              |
| European plaice         | Solha (I386)                |
| European sardine        | Sardinha (I381)             |
|                         |                             |
| 'Farinheira'            | Farinheira (I164)           |
| Fat back lard           | Toucinho (I392)             |
| Fennel                  | Funcho (I190)               |
| Fish                    | Peixe (I292)                |
| Fish broth              | Caldo de peixe (I084)       |
| Flour                   | Farinha (I160)              |
| Forkbeard               | Abrótea (I004)              |
| French garlic           | Alho francês (I024)         |
| Fresh cheese            | Queijo fresco (I334)        |
|                         |                             |
| Garfish roe             | Ovas de peixe agulha (I272) |
| Garlic                  | Alho (I022)                 |
| Garlic leaf             | Folha de alho (I184)        |
| Gilthead seabream       | Dourada (I143)              |
| Ginger                  | Gengibre (I197)             |
| Goat                    | Cabra (I077)                |
| Goat head               | Cabeça de cabra (I068)      |
| Goat stomach            | Bandulho de cabra (I041)    |
| Goat tripe              | Tripa de cabra (I396)       |
| Goatling                | Cabrito (I078)              |
| Goatling backbone       | Espinhaço de cabrito (I154) |
| Goatling blood          | Sangue de cabrito (I364)    |
| Goatling cutlet         | Costeleta de cabrito (I133) |
| Goatling front leg      | Mão de cabrito (I233)       |
| Goatling giblets        | Miúdos de cabrito (I250)    |
| Goatling head           | Cabeça de cabrito (I069)    |
| Goatling leg            | Perna de cabrito (I299)     |
| Goatling offal          | Fressura de cabrito (I250)  |
| Goatling stomach        | Bucho de cabrito (I062)     |
| Goatling tripe          | Tripa de cabrito (I397)     |
| Goby                    | Caboz (I076)                |
| Green pepper            | Pimenta verde (I316)        |
| Green                   | Grelo (I201)                |

|                     |                                        |
|---------------------|----------------------------------------|
| Greens 'chouriça'   | Chouriça de verdes (I114)              |
| Grey mullet         | Tainha/Muge (I387)                     |
| Gurnard             | Ruivo (I352)                           |
| Half-hard cheese    | Queijo de meia-cura (I333)             |
| Ham                 | Fiambre (I172)                         |
| Hard cheese         | Queijo curado (I331)                   |
| Hare                | Lebre (I212)                           |
| Hare blood          | Sangue de lebre (I371)                 |
| Hare leg            | Perna de lebre (I301)                  |
| Hare loin           | Lombo de lebre (I220)                  |
| Hen                 | Galinha (I191)                         |
| Hen blood           | Sangue de galinha (I367)               |
| Hen broth           | Caldo de galinha (I083)                |
| Hen giblets         | Miúdos de galinha (I247)               |
| Honey               | Mel (I239)                             |
| Horseradish         | Rábano (I338)                          |
| Hot paprika         | Pimento queimão/Colorau picante (I319) |
| Lamb                | Borrego (I058)                         |
| Lamb blood          | Sangue de borrego (I363)               |
| Lamb brains         | Miolos de borrego (I243)               |
| Lamb brisket        | Peito de borrego (I286)                |
| Lamb cutlet         | Costeleta de borrego (I132)            |
| Lamb front leg      | Mão de borrego (I232)                  |
| Lamb giblets        | Miúdos de borrego (I249)               |
| Lamb head           | Cabeça de borrego (I067)               |
| Lamb heart          | Coração de borrego (I128)              |
| Lamb leg            | Perna de borrego (I298)                |
| Lamb liver          | Fígado de borrego (I174)               |
| Lamb neck           | Pescoço de borrego (I308)              |
| Lamb offal          | Fressura de borrego (I249)             |
| Lamb saddle         | Sela de borrego (I385)                 |
| Lamb shoulder-blade | Espádua de borrego (I151)              |
| Lamb stomach        | Bucho de borrego (I061)                |
| Lamb tripe          | Tripa de borrego (I395)                |
| Lard                | Banha (I042)                           |
| Largemouth bass     | Achigã (I008)                          |
| Leek (wild)         | Alho bravo/Alho porro (I023)           |
| Lemon               | Limão (I215)                           |
| Lemon rind          | Casca de limão (I101)                  |
| Lettuce             | Alface (I020)                          |
| Limpet              | Lapa (I210)                            |
| Liver paté          | Paté de fígado (I284)                  |

|                     |                                |
|---------------------|--------------------------------|
| Lusitanian toadfish | Charroco (I111)                |
| Knobbed triton      | Búzio (I066)                   |
| Madeira             | Vinho da Madeira (I413)        |
| Malagueta pepper    | Malagueta (I227)               |
| Manioc meal         | Farinha de pau/Mandioca (I163) |
| Margarine           | Margarina (I237)               |
| Marjoram            | Manjerona (I229)               |
| Meagre              | Corvina (I130)                 |
| Meat                | Carne (I094)                   |
| Meat gravy          | Caldo de carne (I082)          |
| Milk                | Leite/Almece (I214)            |
| Mint                | Hortelã (I202)                 |
| Mixed cereal bread  | Pão de mistura (I279)          |
| Molasse             | Mel de cana/Melaço (I240)      |
| Monk                | Tamboril (I388)                |
| Monk liver          | Fígado de tamboril (I179)      |
| Moray               | Moreia (I254)                  |
| 'Morcela'           | Morcela (I253)                 |
| 'Moura'             | Moura (I257)                   |
| Murex               | Búzio (I066)                   |
| Mushroom            | Cogumelo (I123)                |
| Mustard             | Mostarda (I256)                |
| Nase                | Boga (I057)                    |
| Noodles             | Massa (I238)                   |
| Norway lobster      | Lagostim (I207)                |
| Nutmeg              | Noz moscada (I263)             |
| Oil for frying      | Óleo (I264)                    |
| Olive oil           | Azeite (I032)                  |
| Onion               | Cebola (I105)                  |
| Onion leaf          | Folha de cebola (I185)         |
| Onion skin          | Casca de cebola (I099)         |
| Orange              | Laranja (I211)                 |
| Orange leaf         | Folha de laranjeira (I186)     |
| Orange rind         | Casca de laranja (I100)        |
| Oregano             | Óregão (I265)                  |
| Oxtail              | Rabo de boi (I339)             |
| Oyster              | Ostra (I270)                   |
| 'Paio'              | Paio (I276)                    |
| Paprika             | Colorau (I125)                 |

|                       |                                 |
|-----------------------|---------------------------------|
| Parsley               | Salsa (I360)                    |
| Parsnip               | Xerovia (I421)                  |
| Partridge             | Perdiz (I297)                   |
| Pea                   | Ervilha (I149)                  |
| Pennyroyal            | Poejo (I325)                    |
| Pepper/Green pepper   | Pimento/Pimento verde (I321)    |
| Pheasant              | Faisão (I158)                   |
| Pickle                | Pickle (I312)                   |
| Pigeon                | Pombo (I327)                    |
| Pine-nut              | Pinhão (I323)                   |
| Piri-piri             | Piri-piri (I324)                |
| Pork                  | Porco (I328)                    |
| Pork back fat         | Manta de porco (I230)           |
| Pork backbone         | Espinhaço de porco (I155)       |
| Pork bacon rind       | Coirato de porco (I124)         |
| Pork belly            | Barriga de porco (I045)         |
| Pork bladder          | Bexiga de porco (I053)          |
| Pork blood            | Sangue de porco (I375)          |
| Pork bone             | Osso de porco (I267)            |
| Pork brain            | Miolos/Mioleira de porco (I244) |
| Pork brisket          | Peito de porco (I289)           |
| Pork cheek            | Faceira de porco (I157)         |
| Pork dewlap           | Barbela de porco (I043)         |
| Pork dripping         | Pingue de porco (I322)          |
| Pork ear              | Orelha de porco (I266)          |
| Pork fillet           | Febra de porco (I167)           |
| Pork fresh leg        | Perna de porco (I302)           |
| Pork fried mesentery  | Riçol de porco (I346)           |
| Pork gristle          | Cartilagem de porco (I098)      |
| Pork gullet           | Goela de porco (I198)           |
| Pork head             | Cabeça de porco (I074)          |
| Pork heart            | Coração de porco (I129)         |
| Pork hock             | Lacão de porco (I205)           |
| Pork jowl             | Papada de porco (I280)          |
| Pork kidney           | Rim de porco (I349)             |
| Pork lips             | Beiço de porco (I048)           |
| Pork liver            | Fígado de porco (I176)          |
| Pork loin             | Lombo de porco (I221)           |
| Pork lung             | Bofe de porco (I055)            |
| Pork mesenteric rinds | Redenho de porco (I344)         |
| Pork nape             | Cachaço de porco (I080)         |
| Pork offal            | Fressura de porco (I188)        |
| Pork omentum          | Véu de porco (I409)             |
| Pork rib              | Costeleta de porco (I134)       |

|                      |                                      |
|----------------------|--------------------------------------|
| Pork shoulder blade  | Pá de porco (I275)                   |
| Pork snout           | Focinho de porco (I183)              |
| Pork spare ribs      | Entrecosto de porco (I146)           |
| Pork spleen          | Baço de porco (I036)                 |
| Pork stomach         | Bucho de porco (I064)                |
| Pork tail            | Rabo de porco (I340)                 |
| Pork tenderloin      | Lombinhos de porco (I219)            |
| Pork tongue          | Língua de porco (I216)               |
| Pork tripe           | Tripa de porco (I398)                |
| Pork trotter         | Pézinho de porco (I311)              |
| Pork, 'colada' flesh | Porco, carnes da colada (I329)       |
| Pork's belly fat     | Unto (I404)                          |
| Port wine            | Vinho do Porto (I415)                |
| Potato               | Batata (I046)                        |
| Poultry liver        | Fígado de aves (I173)                |
| Pouting              | Faneca (I159)                        |
| Pumpkin              | Abóbora/Mogango (I003)               |
| Purslane             | Beldroega (I049)                     |
| Quail                | Codorniz (I119)                      |
| Rabbit               | Coelho (I120)                        |
| Rabbit blood         | Sangue de coelho (I365)              |
| Radish               | Rabanete (I337)                      |
| Raisin/Dried raisin  | Uva/Passa (I405)                     |
| Ray                  | Raia (I341)                          |
| Ray liver            | Fígado de raia (I177)                |
| Razor clams          | Langueirão/Lingueirão/Navalha (I209) |
| Red pepper           | Pimento vermelho (I320)              |
| Red pepper           | Pimenta vermelha (I317)              |
| Red scorpion fish    | Rocaz/Rascasso (I351)                |
| Red 'vinho verde'    | Vinho verde tinto (I419)             |
| Red wine             | Vinho tinto (I416)                   |
| Rice                 | Arroz (I029)                         |
| Roach                | Pardelha (I281)                      |
| Rose pepper          | Pimenta rosa (I315)                  |
| Rosemary             | Alecrim (I019)                       |
| Rum                  | Rum (I353)                           |
| Rye bread            | Pão de centeio (I278)                |
| Rye flour            | Farinha de centeio (I161)            |
| Safflower            | Açafrão/Açaflor/Açafroa (I005)       |
| Saffron              | Açafrão verdadeiro (I006)            |
| Sage                 | Salva (I362)                         |



|                             |                            |
|-----------------------------|----------------------------|
| Salami                      | Salame (I356)              |
| 'Salpicão'                  | Salpicão (I359)            |
| Sausage/Fresh sausage       | Salsicha (I361)            |
| Savory                      | Segurelha (I384)           |
| Scabbard                    | Espada/Peixe-espada (I150) |
| Sea bass                    | Robalo (I350)              |
| Sea bass head               | Cabeça de robalo (I075)    |
| Sea lamprey                 | Lampreia (I208)            |
| Sea lamprey blood           | Sangue de lampreia (I370)  |
| Sea lamprey roe             | Ovas de lampreia (I271)    |
| Sea mussel                  | Mexilhão (I241)            |
| Sheep                       | Carneiro (I095)            |
| Sheep brisket               | Peito de carneiro (I287)   |
| Sheep front leg             | Mão de carneiro (I234)     |
| Sheep head                  | Cabeça de carneiro (I070)  |
| Sheep leg                   | Perna de carneiro (I300)   |
| Sheep rib                   | Costela de carneiro (I131) |
| Sheep stomach               | Bucho de carneiro (I063)   |
| Sheep tripe                 | Tripas de carneiro (I400)  |
| Shrimp/Prawn                | Camarão (I085)             |
| Shrimp/Prawn broth          | Caldo de camarão (I081)    |
| Silver side                 | Peixe-rei (I294)           |
| Small spotted dogfish       | Pata-roxa (I283)           |
| Small spotted dogfish liver | Fígado de pata-roxa (I175) |
| Smoothhound                 | Cação (I079)               |
| Snail                       | Caracol (I090)             |
| Sole                        | Linguado (I217)            |
| Sole young of the year      | Linguado do rio (I218)     |
| Spinach                     | Espinafre (I153)           |
| Spinous spider crab         | Santola (I378)             |
| Squash                      | Beringela (I051)           |
| Squid                       | Lula (I225)                |
| String bean                 | Feijão verde (I170)        |
| Striped mullet              | Fataça (I165)              |
| Stripped red mullet         | Salmonete (I358)           |
| Stripped red mullet liver   | Fígado de salmonete (I178) |
| Stuffed olive               | Azeitona recheada (I034)   |
| Suckling pig                | Leitão (I213)              |
| Suckling pig blood          | Sangue de leitão (I372)    |
| Suckling pig giblets        | Miúdos de leitão (I189)    |
| Suckling pig kidney         | Rim de leitão (I348)       |
| Suckling pig offal          | Fressura de leitão (I189)  |
| Suckling pig sauce          | Molho de leitão (I251)     |
| Suet                        | Rilada (I347)              |

|                     |                                |
|---------------------|--------------------------------|
| Sugar               | Açúcar (I009)                  |
| Sugarcane spirit    | Aguardente de cana (I013)      |
| Swedish turnip root | Raba (I335)                    |
| Sweet pepper        | Morrone (I255)                 |
| Sweet potato        | Batata doce (I047)             |
| Tarragon            | Estragão (I156)                |
| Thistle             | Cardo (I093)                   |
| Thyme               | Tomilho (I390)                 |
| Tomato              | Tomate (I389)                  |
| Tops                | Grelo (I201)                   |
| Truffle             | Túbera (I402)                  |
| Trush               | Tordo (I391)                   |
| Tuna                | Atum (I031)                    |
| Turkey              | Peru (I306)                    |
| Turkey blood        | Sangue de peru (I374)          |
| Turkey giblets      | Miúdos de peru (I248)          |
| Turmeric            | Açafrão/Açaflor/Açafroa (I005) |
| Turnip              | Nabo (I259)                    |
| Turnip green        | Nabiça (I258)                  |
| Turnip leaf         | Rama de nabo (I343)            |
| Twaite shad         | Saboga (I354)                  |
| Veal                | Vitela (I420)                  |
| Veal bone           | Osso de vitela (I269)          |
| Veal brisket        | Peito de vitela (I291)         |
| Veal chop           | Costeleta de vitela (I135)     |
| Veal for boiling    | Aba de vitela (I002)           |
| Veal front leg      | Mão de vitela (I236)           |
| Veal leg            | Perna de vitela (I304)         |
| Veal liver          | Fígado de vitela (I182)        |
| Veal loin           | Lombo de vitela (I223)         |
| Veal lung           | Bofe de vitela (I056)          |
| Veal rump           | Alcatra de vitela (I017)       |
| Veal spare ribs     | Entrecosto de vitela (I147)    |
| Veal spleen         | Baço de vitela (I038)          |
| Veal tripe          | Tripa de vitela (I399)         |
| Vinegar             | Vinagre (I410)                 |
| 'Vinho verde'       | Vinho verde (I417)             |
| Walnut              | Noz (I262)                     |
| Water cress         | Agrião (I010)                  |
| Wedge clam          | Conquilha/Cadelinha (I127)     |
| Wheat grain         | Trigo (I394)                   |

|                     |                               |
|---------------------|-------------------------------|
| Whiskey             | Uísque (I403)                 |
| White cabbage       | Couve lombarda (I137)         |
| White cabbage       | Repolho coração de boi (I345) |
| White grouper       | Garoupa (I195)                |
| White pepper        | Pimenta (I313)                |
| White seabream      | Sargo (I382)                  |
| White 'vinho verde' | Vinho verde branco (I418)     |
| White wine          | Vinho branco (I412)           |
| Whitting            | Pescada (I307)                |
| Wine                | Vinho (I411)                  |
| Wine spirit         | Aguardente (I012)             |
| Woodcock            | Galinholá (I192)              |
| Worcester sauce     | Molho inglês (I252)           |
| Wreckfish           | Cherne (I112)                 |
| Wreckfish head      | Cabeça de cherne (I071)       |
| Yam                 | Inhame (I204)                 |
| Young beef          | Novilho (I261)                |
